# Supplementary material
Source: PubMed Central journal article supplement (PMC3067359)

# Supplementary Figure 1

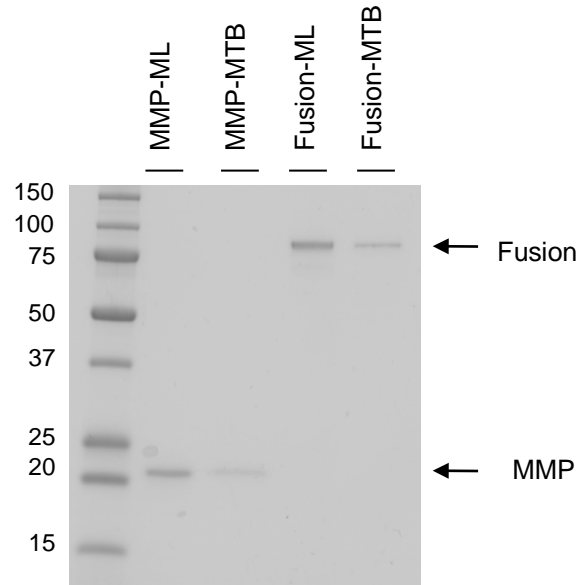

Supplement: supp_18_2_235__1.pdf [file supp_18_2_235__1.pdf]
